# Supplementary material for: Health Literacy in Web-Based Health Information Environments: Systematic Review of Concepts, Definitions, and Operationalization for Measurement
Source: PubMed Central journal article supplement (PMC6315258; doi:10.2196/10273), 2018-12-19
Supplement: jmir_v20i12e10273_app1.pdf [file jmir_v20i12e10273_app1.pdf]

Multimedia Appendix 1. The search strategy.

Online OR internet OR digital OR web OR "social media" OR SNS\* OR "social networking site\*" OR "social networking service\*" OR facebook OR twitter OR youtube OR instagram OR snapchat OR periscope

AND

health\* OR wellbeing OR well-being OR wellness OR disease OR health OR e-health OR ehealth

AND

literacy OR literacies OR comprehend\* OR "abilit\* N2 (read\* OR search\* OR seek\* OR writ\* OR evaluat\* OR assess\*)" OR "comprehen\* N2 read\*" OR "skill\* N2 (read\* OR search\* OR seek\* OR writ\* OR evaluat\* OR assess\*)" OR competenc\* OR "health knowledge" OR numeracy
