# Supplementary material for: Health Literacy in Web-Based Health Information Environments: Systematic Review of Concepts, Definitions, and Operationalization for Measurement
Source: PubMed Central journal article supplement (PMC6315258; doi:10.2196/10273), 2018-12-19
Supplement: jmir_v20i12e10273_app2.pdf [file jmir_v20i12e10273_app2.pdf]

Multimedia Appendix 2. Characteristics of the included studies (N=68).

| Study and year                     | Research area                    | Method of data collection to study health literacy | Method of data analysis | Sample and target population                      | Health literacy concept used (main concept first), defined by                            | Tool used to assess health literacy                                         |
|------------------------------------|----------------------------------|----------------------------------------------------|-------------------------|---------------------------------------------------|------------------------------------------------------------------------------------------|-----------------------------------------------------------------------------|
| Agree et al, 2015 [56]             | Sociology                        | Questionnaire survey                               | Quantitative            | 346 adults over 35 years                          | Health literacy by Ratzan and Parker [41]                                                | REALM <sup>a</sup>                                                          |
| Allam et al, 2015 [131]            | Communication                    | Questionnaire survey performance tests             | Quantitative            | 39 marketing students + 197 adults                | <i>Bad</i> Health literacy by Schulz and Nakamoto [55]                                   | knowledge test (vaccination)                                                |
| Austvoll-Dahlgren et al, 2012 [83] | Health sciences                  | Questionnaire survey, task data                    | Quantitative            | 96 parents                                        | Health literacy by Nutbeam [39,47]; Zarcadoolas et al [48]                               | Search tasks and DISCERN <sup>b</sup> , TPB <sup>c</sup> , PAM <sup>d</sup> |
| Bailey et al, 2015 [57]            | Pharmacy                         | Questionnaire survey                               | Quantitative            | 1077 patients                                     | Health literacy by Ratzan and Parker [41]                                                | NVS <sup>e</sup>                                                            |
| Bickmore et al, 2016 [58]          | Computer and information science | Questionnaire survey                               | Quantitative            | 89 participants with low HL and computer literacy | Health literacy by Ratzan and Parker [41]                                                | REALM                                                                       |
| Blackstock et al, 2016 [104]       | Medicine                         | Interviews                                         | Quantitative            | 63 women with HIV                                 | eHealth literacy by Norman and Skinner [15]                                              | eHEALS <sup>f</sup>                                                         |
| Chan et al, 2011 [109]             | Biomedical informatics           | Performance tasks, audio-recordings                | Mixed                   | 1 user in pilot phase, 20 users in testing        | eHealth literacy by Norman and Skinner [15]                                              | Cognitive task analysis + performance tasks                                 |
| Chang et al, 2015 [110]            | Health education                 | Questionnaire survey                               | Quantitative            | 1869 students and 1365 parents                    | eHealth literacy by Norman and Skinner [15]                                              | eHEALS; EHIL <sup>g</sup>                                                   |
| Chisolm et al, 2011 [59]           | Medicine                         | Questionnaire survey                               | Quantitative            | 180 adolescents                                   | Health literacy by Ratzan and Parker [41]                                                | TOFHLA <sup>h</sup>                                                         |
| Choi et al, 2013 [100]             | Gerontology                      | Questionnaire survey                               | Quantitative            | 270 under 60 yrs, 763 over 60 yrs                 | eHealth literacy by Norman and Skinner [15]                                              | eHEALS                                                                      |
| Chung et al, 2015 [60]             | Nursing                          | Questionnaire survey                               | Quantitative            | 866 older adults                                  | eHealth literacy by Norman and Skinner [15]<br>Health literacy by Ratzan and Parker [41] | eHEALS                                                                      |
| Cnossen et al, 2016 [61]           | Medicine                         | Questionnaire survey                               | Quantitative            | 38 patients                                       | Health literacy by Ratzan and Parker [41]                                                | FCCHL (Dutch) <sup>i</sup>                                                  |
| Connolly et al, 2015 [111]         | Medicine                         | Focus groups                                       | Qualitative             | 25 adults with diabetes                           | eHealth literacy by Norman and Skinner [15]                                              | Qualitative assessment                                                      |
| Crook et al, 2016 [62]             | Communication                    | Questionnaire survey                               | Quantitative            | 180 adults from health care clinic                | Health literacy by Berkman et al [44]; Ratzan and Parker [41]                            | NVS                                                                         |
| Duncan et al, 2015 [108]           | Medicine and public health       | Questionnaire survey                               | Quantitative            | 301 middle-aged men                               | Health literacy by Nutbeam [50]; Australian Bureau of Statistics [42]                    | Active Australia Questionnaire + Dietary behavior literacy                  |
| Echt et al, 2011 [84]              | Medicine                         | Questionnaire survey                               | Quantitative            | 250 older adults                                  | Health literacy by Nutbeam [39]                                                          | S-TOFHLA <sup>i</sup>                                                       |

|                            |                                    |                                  |              |                                                     |                                                                   |                                                                |
|----------------------------|------------------------------------|----------------------------------|--------------|-----------------------------------------------------|-------------------------------------------------------------------|----------------------------------------------------------------|
| Fagnano et al, 2012 [63]   | Medicine                           | Questionnaire survey             | Quantitative | 304 caregivers of children with astma               | Health literacy by Ratzan and Parker [41]                         | REALM                                                          |
| Furnival et al, 2015 [89]  | Information science                | Questionnaire survey, interviews | Quantitative | 73 participants                                     | Health Information Literacy by Shipman et al [20]                 | EHIL (adapted)                                                 |
| Ghaddar et al, 2012 [64]   | Health promotion, public health    | Questionnaire survey             | Quantitative | 261 students                                        | Health literacy by Ratzan and Parker [41]                         | eHEALS, NVS                                                    |
| Gutierrez et al, 2015 [87] | Medicine                           | Questionnaire survey             | Quantitative | 498 adult patients                                  | Health literacy by the American Medical Association [40]          | NVS + confidence in filling medical forms                      |
| Haun et al, 2015 [112]     | Health communication and promotion | Questionnaire survey             | Quantitative | 819 US veterans                                     | eHealth literacy by Norman and Skinner [15]                       | BRIEF <sup>k</sup> , eHEALS                                    |
| Hogan et al, 2016 [113]    | Medicine                           | Questionnaire survey             | Quantitative | 290 US veterans                                     | eHealth literacy by Norman and Skinner [15]                       | eHEALS                                                         |
| Hsu et al, 2015 [114]      | Health education                   | Questionnaire survey             | Quantitative | 525 college students                                | eHealth literacy by Norman and Skinner [15]; Bodie and Dutta [51] | eHLS <sup>l</sup>                                              |
| Hu et al, 2012 [95]        | Communication                      | Questionnaire survey             | Quantitative | 505 patients and members of an online support group | eHealth literacy by Norman and Skinner [15]                       | eHEALS                                                         |
| Jiang et al, 2016 [65]     | Communication                      | Questionnaire survey             | Quantitative | 2305 participants                                   | Health literacy by Ratzan and Parker [41]                         | HINTS <sup>m</sup> health literacy screening measure (adapted) |
| Kim, 2013 [66]             | Information studies                | Questionnaire survey             | Quantitative | 3002 observations                                   | Health literacy by Ratzan and Parker [41]                         | Single-item: health information search online (yes/no)         |
| Knapp et al, 2011 [115]    | Health policy                      | Questionnaire survey             | Quantitative | 129 parents                                         | eHealth literacy by Norman and Skinner [15]                       | eHEALS                                                         |
| Knapp et al, 2011 [116]    | Health policy                      | Questionnaire survey             | Quantitative | 2371 parents                                        | eHealth literacy by Norman and Skinner [15]                       | eHEALS                                                         |
| Kobayashi et al, 2015 [67] | Epidemiology and public health     | Questionnaire survey             | Quantitative | 4368 older adults                                   | Health literacy by Ratzan and Parker [41]                         | Adult Literacy & Life Skills Survey                            |
| Koo et al, 2012 [117]      | Health sciences                    | Questionnaire survey             | Quantitative | 219 sixth-grade school children                     | eHealth literacy by Norman and Skinner [15]                       | eHEALS                                                         |
| Lee et al, 2012 [80]       | Communication                      | Questionnaire survey             | Quantitative | 1812 adults                                         | Health literacy by Berkman et al [44]                             | Seven health knowledge items                                   |
| Lee et al, 2015 [96]       | Pharmacy                           | Questionnaire survey             | Quantitative | 400 patients                                        | eHealth literacy by Norman and Skinner [15]                       | eHEALS                                                         |
| Lee et al, 2015 [68]       | Nursing                            | Questionnaire survey             | Quantitative | 2680 hispanic adults                                | Health literacy by Ratzan and Parker [41]                         | One-item screening instrument by Chew et al                    |

|                                 |                                       |                                             |              |                                                                         |                                                                                                                                   |                                                                                 |
|---------------------------------|---------------------------------------|---------------------------------------------|--------------|-------------------------------------------------------------------------|-----------------------------------------------------------------------------------------------------------------------------------|---------------------------------------------------------------------------------|
| Li et al, 2015 [118]            | Communication                         | Questionnaire survey                        | Quantitative | 311 members of online support group                                     | eHealth literacy by Norman and Skinner [15]                                                                                       | eHEALS                                                                          |
| Li et al, 2013 [127]            | Social work and social administration | Questionnaire survey                        | Quantitative | 221 undergraduate students                                              | Mental health literacy by Jorm et al [53]                                                                                         | 31 questions; understanding of mental health concepts and application of skills |
| Lintvedt et al, 2013 [128]      | Psychology                            | Questionnaire survey                        | Quantitative | 163 young adults at risk of depression                                  | Mental health literacy by Jorm et al [53]                                                                                         | Treatment depression literacy; knowledge based                                  |
| Manafò et al, 2012 [85]         | Nutrition science                     | Questionnaire survey                        | Mixed        | 48 older adults                                                         | eHealth literacy by Norman and Skinner [15]<br>Health literacy by Nutbeam [39]                                                    | eHEALS (adapted)                                                                |
| Manafò et al, 2013 [69]         | Nutrition science                     | Questionnaire survey                        | Quantitative | 67 older adults                                                         | eHealth literacy by Norman and Skinner [15]<br>Health literacy by Ratzan and Parker [41];<br>Rootman and Gordon-El-Bihbety [43]   | eHEALS; eSEARCH <sup>a</sup>                                                    |
| Marshall, et al, 2012 [86]      | Information science                   | Questionnaire survey, workshops, interviews | Qualitative  | 385 answered to survey, 39 participated in the workshop, 18 interviewed | Health literacy by Nutbeam [39]<br>eHealth literacy by Norman and Skinner [15]                                                    | Qualitative assessment of information literacy regarding health                 |
| Mayberry et al, 2011 [70]       | Medicine                              | Questionnaire survey                        | Quantitative | 61 adults with type 2 diabetes                                          | Health literacy by Ratzan and Parker [41]                                                                                         | Three-item HL screening instrument by Chew (modified)                           |
| McCleary-Jones et al, 2013 [71] | Nursing                               | Questionnaire survey                        | Quantitative | 88 African-American adults                                              | Health literacy by Ratzan and Parker [41]; the American Medical Association [40]                                                  | SILS <sup>o</sup>                                                               |
| Meppelink et al, 2015 [81]      | Communication                         | Questionnaire survey, audio-recordings      | Quantitative | 61 participants with low or limited HL                                  | Health literacy by Berkman et al [44]                                                                                             | Short Assessment of Health Literacy in Dutch (SAHL-D)                           |
| Milne et al, 2015 [105]         | Medicine                              | Questionnaire survey                        | Quantitative | 83 cancer patients                                                      | eHealth literacy by Norman and Skinner [15]                                                                                       | eHEALS                                                                          |
| Mitsutake et al, 2012 [119]     | Health and Behavioral Sciences        | Questionnaire survey                        | Quantitative | 2970 Japanese adults                                                    | eHealth literacy by Norman and Skinner [15]                                                                                       | eHEALS (Japanese version)                                                       |
| Nahm et al, 2012 [120]          | Nursing                               | Questionnaire survey                        | Quantitative | 27 caregiver-care receiver dyads (pair)                                 | eHealth literacy by Norman and Skinner [15]                                                                                       | eHEALS                                                                          |
| Neter et al, 2012 [106]         | Behavioral sciences                   | Questionnaire survey                        | Quantitative | 4286 Israeli adults                                                     | eHealth literacy by Norman and Skinner [15]                                                                                       | eHEALS                                                                          |
| Ossebaard et al, 2012 [121]     | Public health                         | Questionnaire survey                        | Quantitative | 21 patients                                                             | eHealth literacy by Norman and Skinner [15]                                                                                       | eHEALS (Dutch version)                                                          |
| Paek et al, 2012 [72]           | Advertising and public relations      | Questionnaire survey                        | Quantitative | 182 students                                                            | eHealth literacy by Norman and Skinner [15]<br>Health literacy by Ratzan and Parker [41];<br>Zarcadoolas, Pleasant and Greer [48] | eHEALS                                                                          |
| Park et al, 2016 [122]          | Nursing                               | Questionnaire survey                        | Quantitative | 108 library users                                                       | eHealth literacy by Norman and Skinner [15]                                                                                       | eHEALS                                                                          |

|                                  |                                          |                                                                              |              |                                                                           |                                                                                                                                                                    |                                                                                           |
|----------------------------------|------------------------------------------|------------------------------------------------------------------------------|--------------|---------------------------------------------------------------------------|--------------------------------------------------------------------------------------------------------------------------------------------------------------------|-------------------------------------------------------------------------------------------|
| Park et al, 2016 [123]           | Nursing                                  | Questionnaire survey                                                         | Quantitative | 108 adults                                                                | eHealth literacy by Norman and Skinner [15]                                                                                                                        | eHEALS                                                                                    |
| Reininger et al, 2013 [124]      | Health promotion and behavioral sciences | Questionnaire survey                                                         | Quantitative | 71 adults at risk for diabetes                                            | eHealth literacy by Norman and Skinner [15]                                                                                                                        | TOFHLS; diabetes knowledge                                                                |
| Rowse et al, 2015 [101]          | Psychology, medicine                     | Questionnaire survey                                                         | Quantitative | 64 adults                                                                 | Health literacy by Nutbeam [50]; Sørensen et al [6]                                                                                                                | One-item screening instrument by Chew et al + HLS-EU-16 <sup>p</sup>                      |
| Sheng et al, 2013 [125]          | Psychology                               | Questionnaire survey                                                         | Quantitative | 771 older adults                                                          | eHealth literacy by Norman and Skinner [15]                                                                                                                        | eHEALS                                                                                    |
| Smith et al, 2015 [73]           | Medicine                                 | Questionnaire survey                                                         | Quantitative | 534 older adults                                                          | Health literacy by Ratzan and Parker [41]                                                                                                                          | NVS                                                                                       |
| Subramaniam et al, 2015 [88]     | Information studies                      | Questionnaire survey, observation, interviews, focus groups, web portal data | Mixed        | 30 students                                                               | Health literacy by Sørensen et al [6]; Zarcadoolas, Pleasant and Greer [48]; National Network of Libraries of Medicine [46]; the American Medical Association [40] | Health literacy skills inventory (a literature based design)                              |
| Sun et al, 2013 [74]             | Social medicine and health education     | Questionnaire survey                                                         | Quantitative | 3222 participants                                                         | Health literacy by Ratzan and Parker [41]; Berkman et al [44]                                                                                                      | A skills-based HL instrument regarding infectious respiratory diseases (Sun)              |
| Tam et al, 2015 [75]             | Medicine (dentistry)                     | Questionnaire survey                                                         | Quantitative | 100 adults                                                                | Health literacy by Sørensen et al [6]; Ratzan and Parker [41]<br>eHealth literacy by Norman and Skinner [15]                                                       | REALM-D <sup>q</sup> ; dental knowledge, a two-item HL screening instrument by Chew et al |
| Taylor-Rodgers et al, 2015 [129] | Psychology                               | Questionnaire survey                                                         | Quantitative | 56 young adults                                                           | Mental health literacy by Jorm et al [53]                                                                                                                          | Literacy of Suicide Scale, A-lit <sup>r</sup> , D-lit                                     |
| Tennant et al, 2015 [76]         | Health education and promotion           | Questionnaire survey                                                         | Quantitative | 283 baby boomers and older adults                                         | eHealth literacy by Norman and Skinner [15]<br>Health literacy by Ratzan and Parker [41]                                                                           | eHEALS                                                                                    |
| Tse et al, 2015 [130]            | Health education                         | Questionnaire survey                                                         | Quantitative | 22 adolescents                                                            | Oral health literacy by the U.S. Department of Health and Human Services [54]                                                                                      | REALD-30 <sup>t</sup>                                                                     |
| van der Vaart et al, 2011 [102]  | Psychology                               | Questionnaire survey                                                         | Quantitative | 189 patients with rheumatic diseases (study 1), 88 Dutch adults (study 2) | eHealth literacy by Norman and Skinner [15]<br>Health literacy by Baker [49]                                                                                       | eHEALS                                                                                    |
| van der Vaart et al, 2013 [126]  | Psychology                               | Performance tasks, think-aloud method, interview                             | Mixed        | 15 + 16 patients                                                          | eHealth literacy by Norman and Skinner [15];<br>eHealth literacy 2.0 by Norman [52]                                                                                | Performance tasks                                                                         |
| van der Vaart et al, 2011 [103]  | Psychology                               | Questionnaire survey                                                         | Quantitative | 227 patients                                                              | Health literacy by Baker [49]                                                                                                                                      | FCCHL (Dutch version)                                                                     |

|                          |                     |                      |              |                                    |                                                                                          |                                                                                                                                                                                                                                                   |
|--------------------------|---------------------|----------------------|--------------|------------------------------------|------------------------------------------------------------------------------------------|---------------------------------------------------------------------------------------------------------------------------------------------------------------------------------------------------------------------------------------------------|
| Wenhong et al, 2015 [82] | Communication       | Questionnaire survey | Quantitative | 540 students                       | eHealth literacy by Norman and Skinner [15]<br>Health literacy Berkman et al [44]        | eHEALS                                                                                                                                                                                                                                            |
| Woods et al, 2016 [99]   | Psychology          | Questionnaire survey | Quantitative | 46 participants with HIV-infection | Health literacy by The Patient Protection and Affordable Care Act [45]                   | eHEALS, REALM, HIV Knowledge 18, Expanded Numeracy Scale, Short Assessment of Health Literacy, TOFHLA, NVS                                                                                                                                        |
| Xie, 2011 [77]           | Information studies | Questionnaire survey | Quantitative | 172 older adults                   | eHealth literacy by Norman and Skinner [15]<br>Health literacy by Ratzan and Parker [41] | eHEALS                                                                                                                                                                                                                                            |
| Xie, 2012 [78]           | Information studies | Questionnaire survey | Quantitative | 218 older adults                   | eHealth literacy by Norman and Skinner [15]<br>Health literacy by Ratzan and Parker [41] | Computer Anxiety Scale; Attitudes Toward Computers Questionnaire (Efficacy and interest subscales); Computer and Web knowledge tests; Questionnaire of the "satisfaction with the training and changes in participation in one's own health care" |
| Xie, 2011 [79]           | Information studies | Questionnaire survey | Quantitative | 156 older adults                   | eHealth literacy by Norman and Skinner [15]<br>Health literacy by Ratzan and Parker [41] | eHEALS                                                                                                                                                                                                                                            |

a Rapid Estimate of Adult Literacy in Medicine

b DISCERN: an instrument for judging the quality of written consumer health information on treatment choices.

c Theory of Planned Behavior

d Patient Activation Measure

e Newest Vital Sign

f eHealth Literacy Scale

g Everyday Health Information Literacy Screening Tool

h Test for Functional Health Literacy in Adults

i Functional, Communicative and Critical Health Literacy Scale

j Short Test for Functional Health Literacy in Adults

k Brief Health Literacy Screening Tool

l eHealth Literacy Scale

m Health Information National Trends Survey

n eSEARCH eHealth Literacy Tool

o Single Item Literacy Screener

p Health Literacy Survey – Europe – 16 Questions

q Rapid Estimate of Adult Literacy in Medicine and Dentistry

r Anxiety Literacy Questionnaire

s Depression Literacy Questionnaire

t Rapid Estimate of Adult Literacy in Dentistry
